# Supplementary material for: Quantum dot–layered double hydroxide composites for near-infrared emitting codes
Source: Royal Society of Chemistry journal article supplement (doi:10.1039/c3tc31699h), 2013-10-17
Supplement: c3tc31699h.pdf [file c3tc31699h.pdf]

## Electronic Supplementary Information (ESI)

### Quantum dot-layered double hydroxide composites for near-infrared emitting codes

Seungho Cho,<sup>†</sup> Seong Cheol Hong,<sup>†</sup> and Sungjee Kim\*

Department of Chemistry, Pohang University of Science and Technology (POSTECH), San 31, Hyoja-Dong, Nam-Gu, Pohang, Gyungbuk, South Korea, 790-784

<sup>†</sup>These authors contributed equally to this work.

\*Corresponding author: E-mail: sungjee@postech.ac.kr

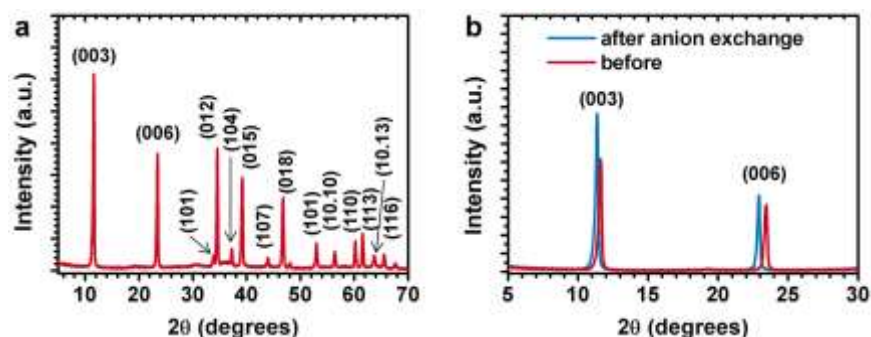

**Figure S1.** (a) XRD pattern of layered double hydroxide (LDH) powders synthesized by the hydrothermal method. (b) XRD patterns of the LDH powders before and after intercalated-anion exchange.

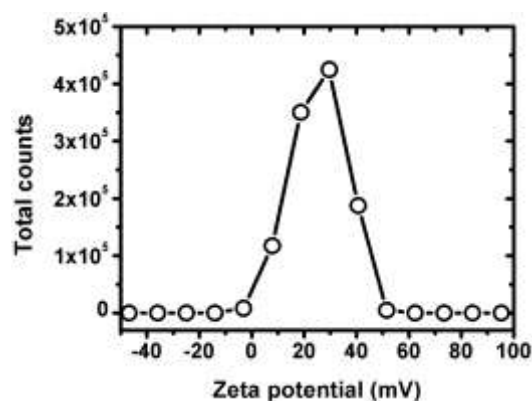

**Figure S2.** Zeta potential measurement performed on an exfoliated layered double hydroxide-dispersed solution.

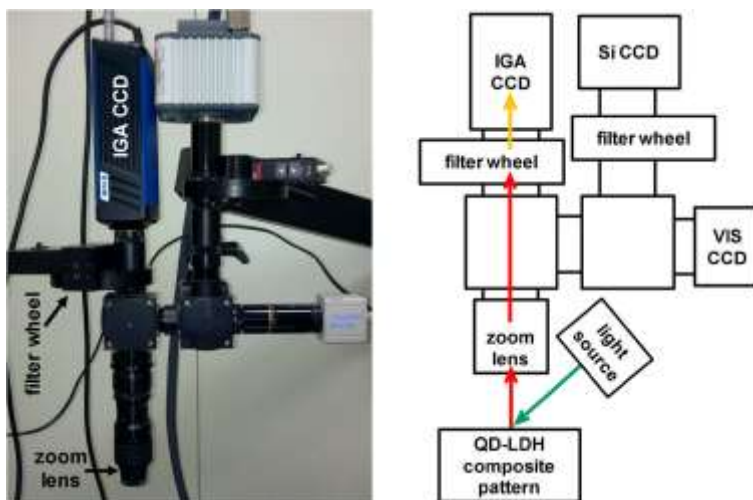

**Figure S3.** Photograph and schematic diagram of the experimental setup for NIR fluorescence imaging of a QD-LDH composite film sample.

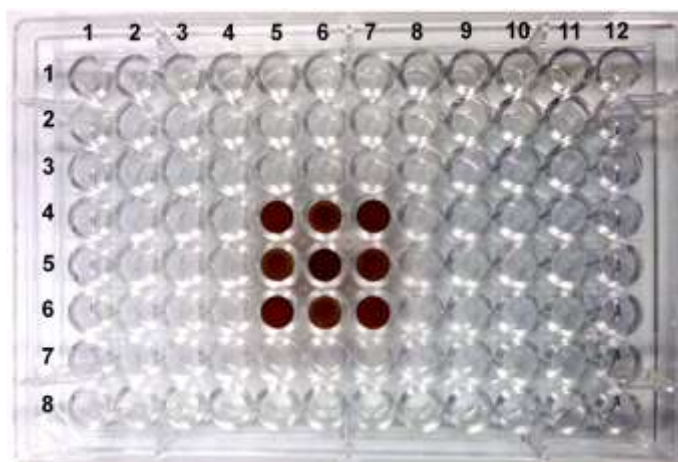

**Figure S4.** Photograph of PbS/CdS quantum dot-layered double hydroxide composite films [(4,6), (5,5), (5,7) and (6,6): Composite I, (4,5), (4,7), (5,6), (6,5) and (6,7): Composite II] on the 96-well plate under room light.
